# Supplementary material for: A Stapled Peptide Mimic of the Pseudosubstrate Inhibitor PKI Inhibits Protein Kinase A
Source: Molecules. 2019 Apr 20;24(8):1567. doi: 10.3390/molecules24081567 (PMC6514771; doi:10.3390/molecules24081567)
Supplement: Supplementary file 1 [file molecules-24-01567-s001.pdf]

## Supplementary Materials

### A stapled peptide mimic of the pseudosubstrate inhibitor PKI inhibits Protein Kinase A

Jascha T. Manschwetus <sup>1,#</sup>, George N. Bendzunas <sup>2,#</sup>, Ameya J. Limaye <sup>2</sup>, Matthias J. Knappe <sup>1,3</sup>,  
Friedrich W. Herberg <sup>1,\*</sup> and Eileen J. Kennedy <sup>2,\*</sup>

<sup>1</sup> Department of Biochemistry, Institute for Biology, University of Kassel, Heinrich-Plett-Str. 40, 34132 Kassel, Germany

<sup>2</sup> Department of Pharmaceutical and Biomedical Sciences, College of Pharmacy, University of Georgia, 240 W. Green St, 30602 Athens, GA United States

<sup>3</sup> Present address: Boehringer Ingelheim Pharma GmbH & Co. KG, Analytical Developments Biologicals, Birkendorfer Strasse 65, 88397 Biberach an der Riss, Germany.

# Authors contributed equally to this work

\* Correspondence: ekennedy@uga.edu; Tel.: +1-706-542-6497 (E.J.K.); herberg@uni-kassel.de; Tel.: +49-561-804-4511(F.W.H.)

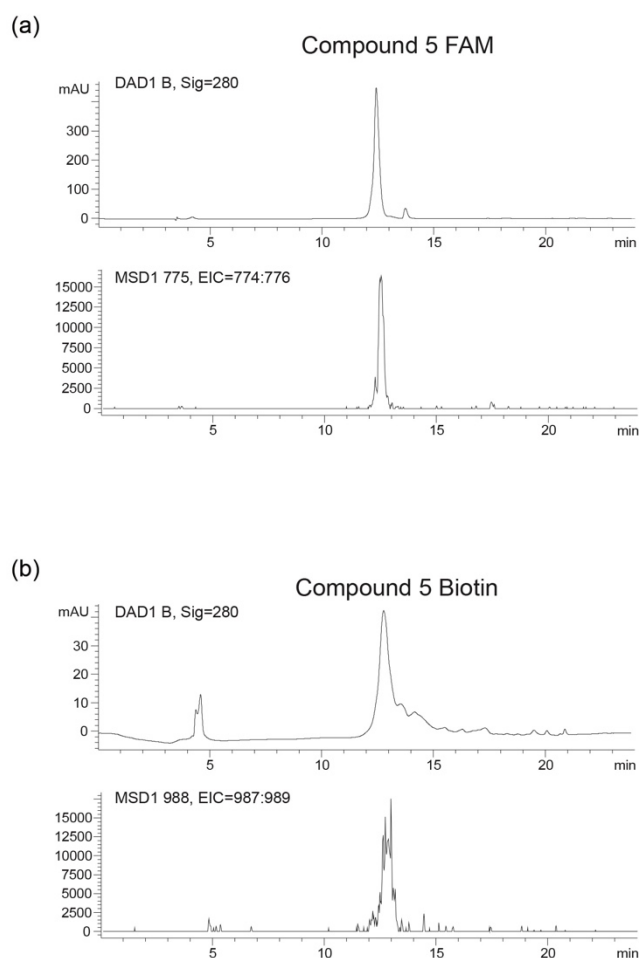

**Figure S1.** LC/MS spectra of HPLC-purified Compound 5. (a) Spectra of purified FAM-5 is shown. The absorbance profile at 280 nm and extracted ion current (EIC) mass spectrometric detection (MSD) are included. The expected mass for  $(M+3)/3=775$ . (b) Spectra of purified Biotin-5 is displayed. The expected mass for  $(M+2)/2=988$ .

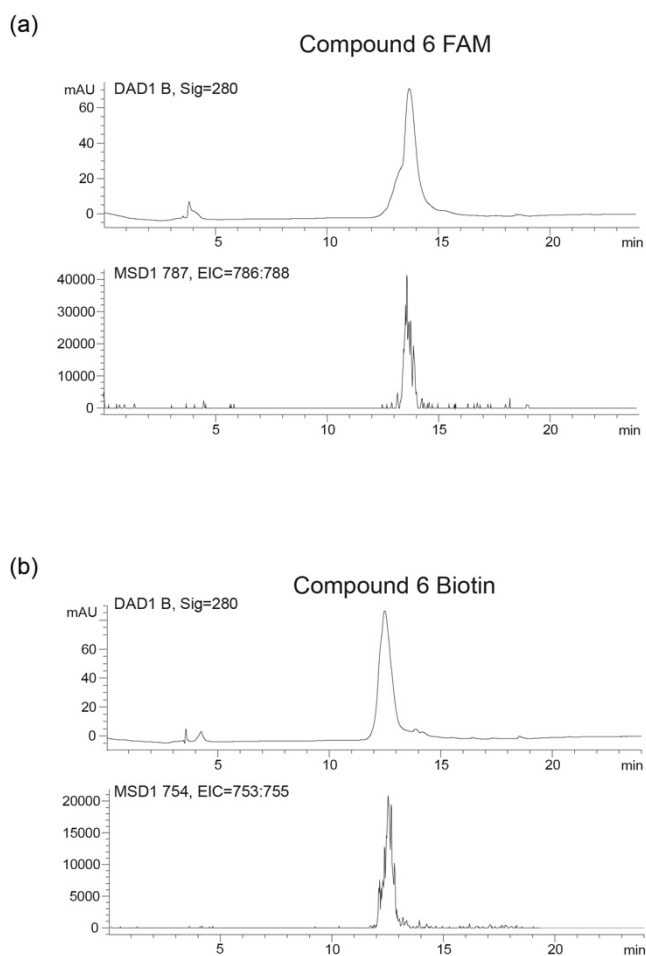

**Figure S2.** LC/MS spectra of HPLC-purified Compound 6. (a) Spectra of purified FAM-6 is shown. The absorbance profile at 280 nm and extracted ion current (EIC) mass spectrometric detection (MSD) are included. The expected mass for  $(M+3)/3=787$ . (b) Spectra of purified Biotin-6 is displayed. The expected mass for  $(M+3)/3=754$ .

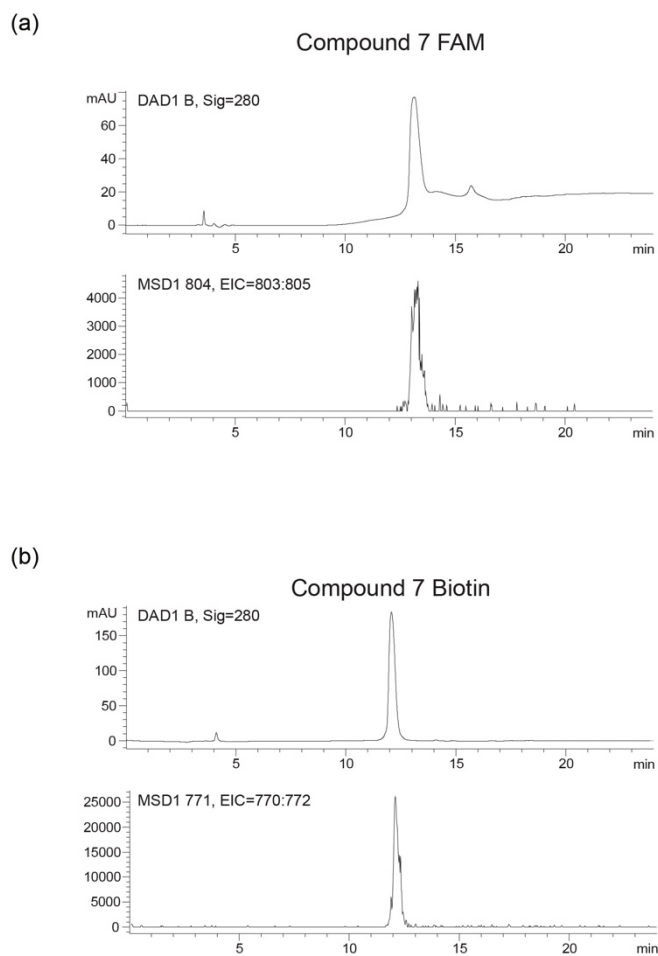

**Figure S3.** LC/MS spectra of HPLC-purified Compound 7. (a) Spectra of purified FAM-7 is shown. The absorbance profile at 280 nm and extracted ion current (EIC) mass spectrometric detection (MSD) are included. The expected mass for  $(M+3)/3=804$ . (b) Spectra of purified Biotin-7 is displayed. The expected mass for  $(M+3)/3=771$ .

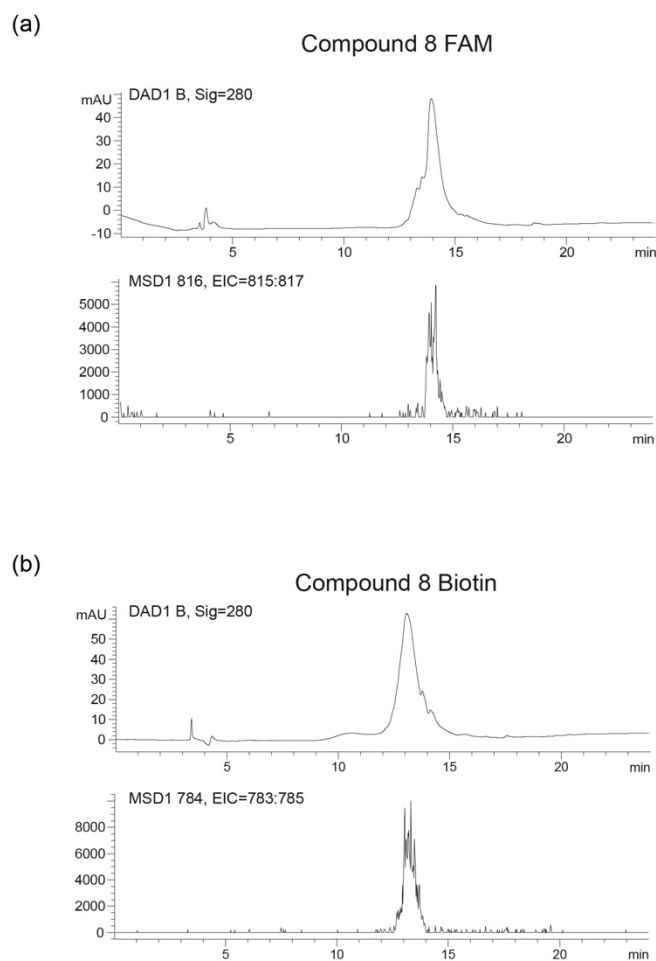

**Figure S4.** LC/MS spectra of HPLC-purified Compound 8. (a) Spectra of purified FAM-8 is shown. The absorbance profile at 280 nm and extracted ion current (EIC) mass spectrometric detection (MSD) are included. The expected mass for  $(M+3)/3=816$ . (b) Spectra of purified Biotin-8 is displayed. The expected mass for  $(M+3)/3=784$ .

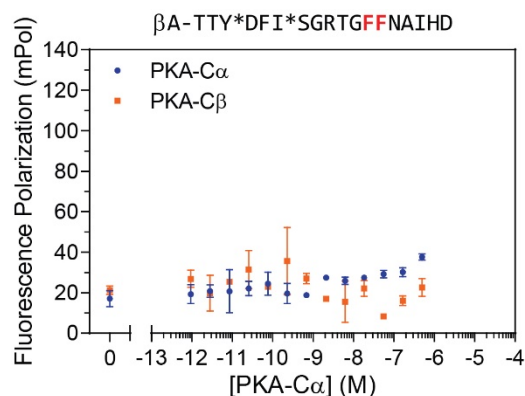

**Figure S5.** Direct binding measurements of a FAM-labeled negative control peptide using fluorescence polarization (FP): Binding measurements of a stapled PKI<sup>5-24</sup> analog (sequence on top) to PKA-C $\alpha$  and PKA-C $\beta$  demonstrate that the two basic Arg residues at P-2 and P-3 are critical for binding comparable to the wildtype protein PKI. This implicates that the interaction of this analog resembles the binding mode of unstapled PKI<sup>5-24</sup>. No binding could be determined under given conditions in three independent measurements with three protein preparations for both PKA-C isoforms.

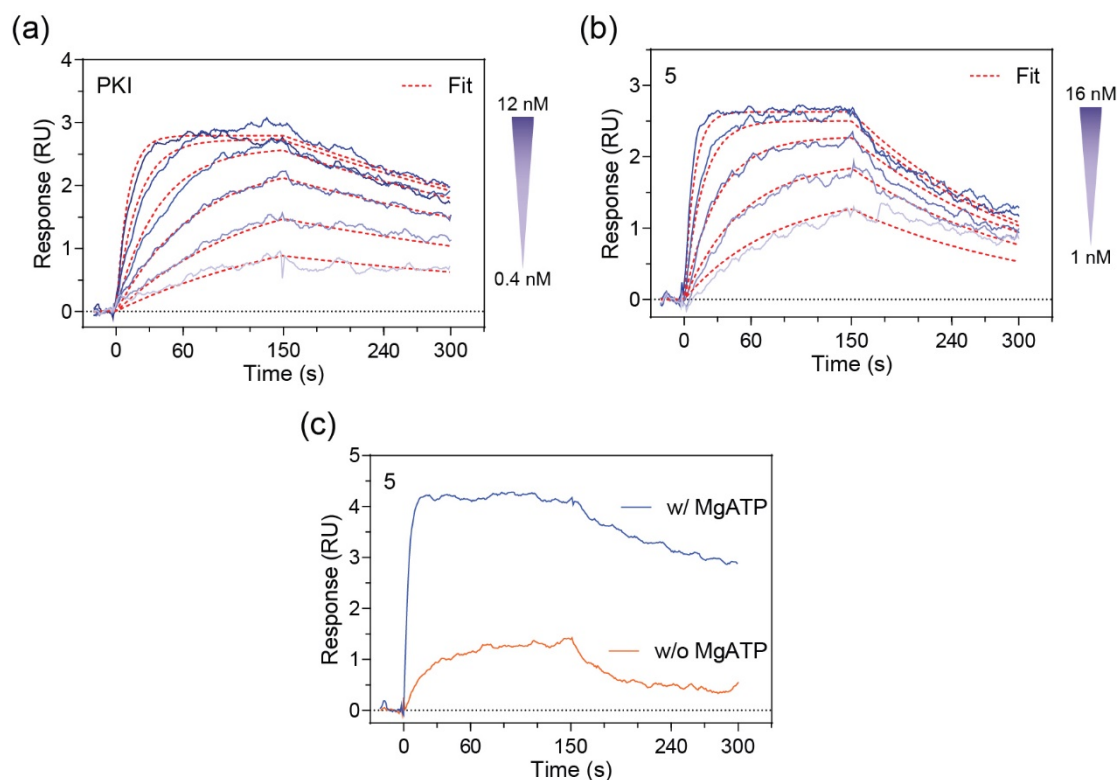

**Figure S6.** Kinetic interaction analyses by Surface Plasmon Resonance (SPR): (a) Binding measurements of the wildtype protein PKI<sup>full-length</sup> show subnanomolar affinities as a result of fast association and slow dissociation rate constants; (b) Binding measurements of Compound 5 reveal comparable binding to the stapled analog 6 (see main article); and (c) Binding of Compound 6 to PKA-C is highly dependent on the presence of 1 mM Mg<sup>2+</sup> and 10 mM ATP as measured using running buffer with or without MgATP. Capture levels of GST-PKA-Cα were 127 and 125 RU for studies with and without MgATP, respectively.

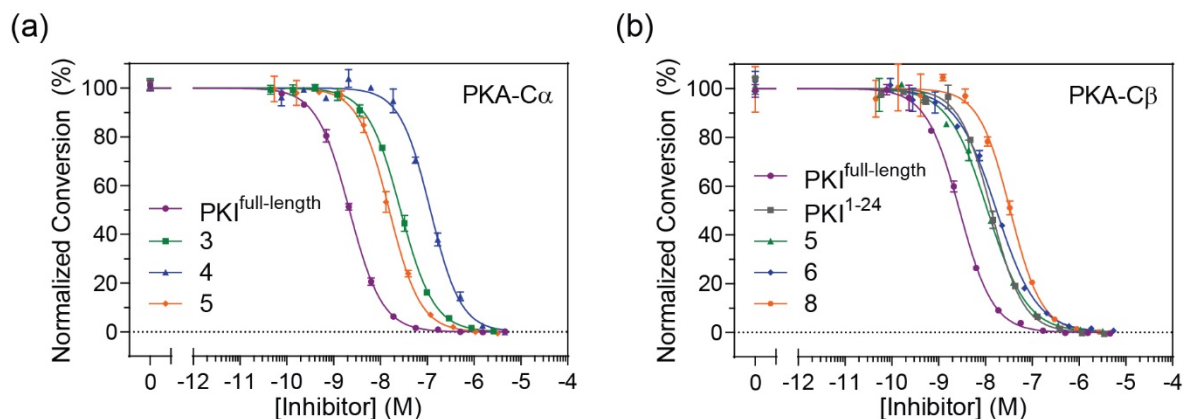

**Figure S7.** Inhibition of kinase activity was monitored using microfluidic electrophoretic mobility shift assays (MMSA): Phosphorylation of Kemptide by PKA-C $\alpha$  (a) was monitored over a concentration range of inhibitor peptide 5 or PKI<sup>full-length</sup>. The wildtype protein still shows increased inhibitory potency most likely due to additional interaction sites. (b) Inhibition of substrate peptide phosphorylation by PKA-C $\beta$ 1 was determined for PKI<sup>full-length</sup>, PKI<sup>1-24</sup> and its derivatives 5, 6 as well as 8. The analyzed inhibitors were found to have IC<sub>50</sub> values that are comparable to PKA-C $\alpha$ , thereby indicating that the hydrocarbon stapling of PKI<sup>1-24</sup> derived peptides does effect isoform specificity.

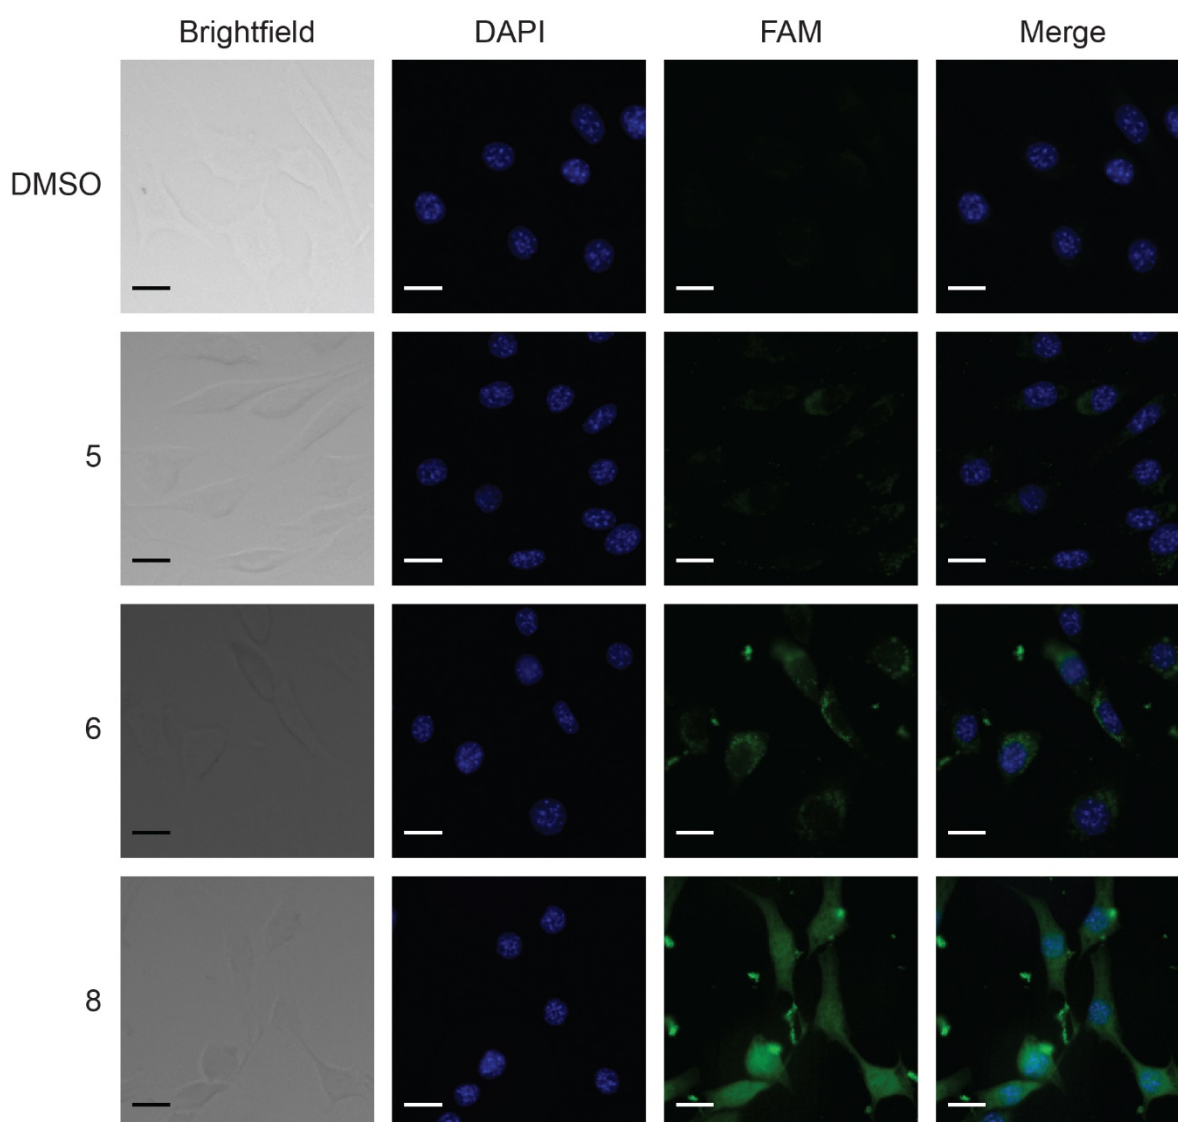

**Figure S8.** Cell permeation assay using NIH-3T3 cells: In DMEM containing 10 % fetal bovine serum, cells were grown to 50 % confluency in 8-chamber slides (CC2 treated, Lab-Tek II, Nalgene Nunc International) and treated with 5  $\mu$ M of FAM-labeled peptides in DMEM for 4 (6 and 8) or 8 h (5 and DMSO ctrl.), respectively. Subsequently, cells were washed, fixed in 2 % paraformaldehyde and embedded in mounting medium containing DAPI (ProLong Gold Antifade Mountant). Cells were imaged at 20  $\times$  magnification using a TCS SP5 microscope (Leica microsystems) before subtracting background (rolling ball radius: 100  $\mu$ M) using ImageJ 1.51n. Compounds 6 and 8 were able to penetrate cells while the unstapled control peptide 5 could not permeate cells. Scale bars indicate 15  $\mu$ m.

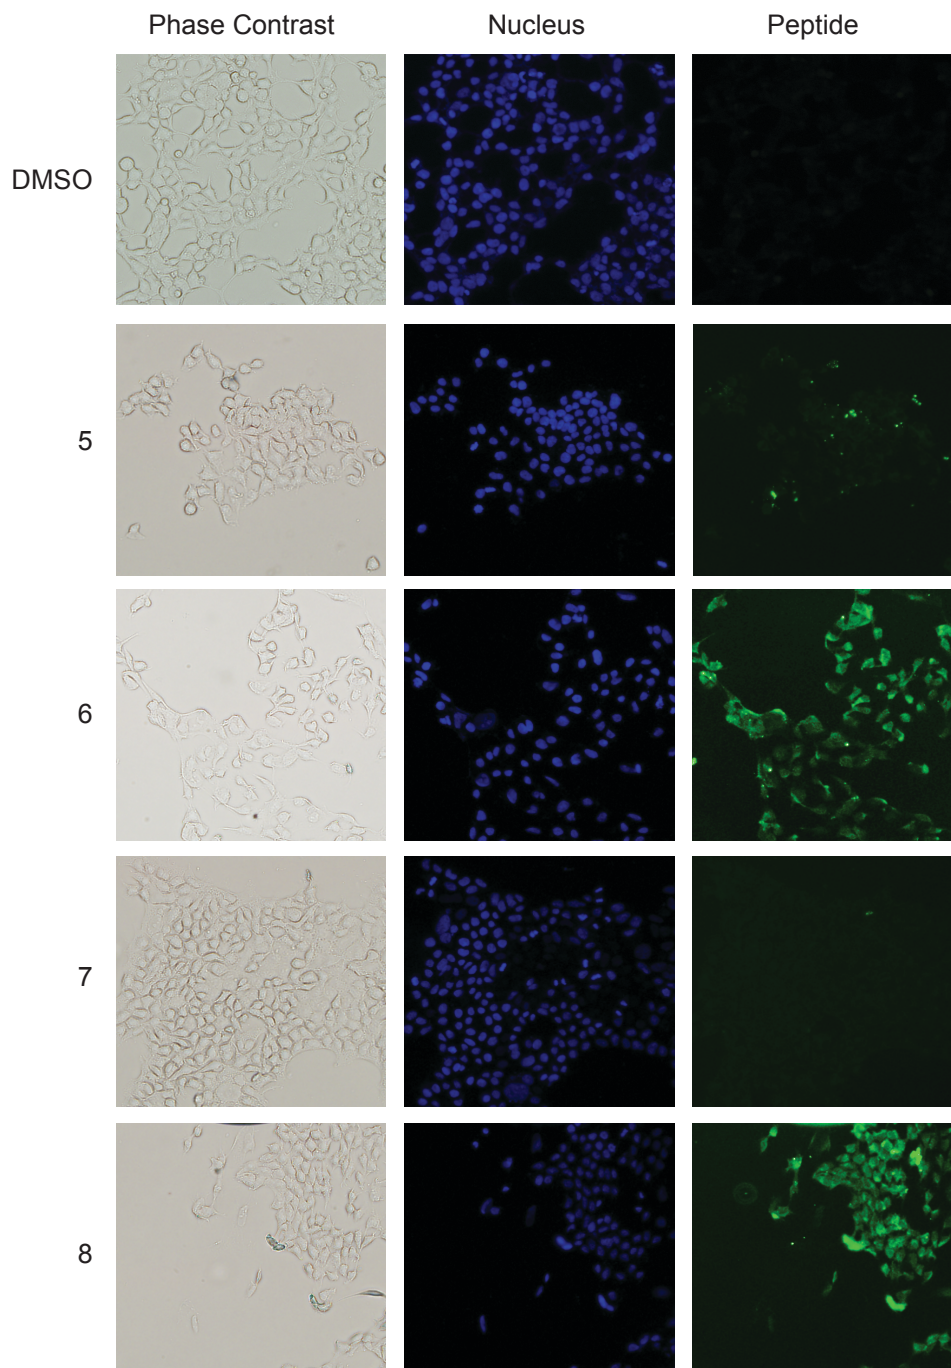

**Figure S9.** Un-zoomed view of cell uptake in HEK293 cells after 8 hr peptide treatment.

**Table S1.** Summary of SPR analysis. Values were obtained from one (PKI<sup>full-length</sup>) or two (5) independent measurements and are given with SD. The kinetics of Compound 5 are similar to those of the stapled analog 6 (see main article).

| Compound                   | $k_a (\times 10^6 \text{ M}^{-1} \text{ s}^{-1})$ | $k_d (\times 10^{-3} \text{ s}^{-1})$ | $K_D (\text{nM})$ |
|----------------------------|---------------------------------------------------|---------------------------------------|-------------------|
| PKI <sup>full-length</sup> | 8.3                                               | 2.4                                   | 0.3               |
| 5                          | $6.2 \pm 1.0$                                     | $4.5 \pm 2.2$                         | $0.7 \pm 0.2$     |

**Table S2.** Summary of additional IC<sub>50</sub> values determined using MMSA analysis. Compound 3 shows half-maximal inhibition of PKA-C $\alpha$  at a low nanomolar level while hydrocarbon stapling (4) decreased the inhibitory potency more than 3-fold. The IC<sub>50</sub> values of both PKI<sup>full-length</sup> and PKI<sup>1-24</sup> as well as its derivatives (5, 6 and 7) towards PKA-C $\beta$  did not notably differ from those towards PKA-C $\alpha$ . Values were obtained from two independent measurements with two protein preparations and are reported in nM with SD.

| Compound                   | PKA-C $\alpha$  | PKA-C $\beta$  |
|----------------------------|-----------------|----------------|
| PKI <sup>full-length</sup> | $2.2 \pm 0.1^2$ | $2.5 \pm 0.4$  |
| 3                          | $30.0 \pm 4.4$  | n.d.           |
| 4                          | $100 \pm 23$    | n.d.           |
| PKI <sup>1-24</sup>        | <sup>1</sup>    | $13.6 \pm 0.4$ |
| 5                          | $15.8 \pm 0.5$  | $10.7 \pm 0.7$ |
| 6                          | <sup>1</sup>    | $19.1 \pm 2.5$ |
| 8                          | <sup>1</sup>    | $32.1 \pm 2.6$ |

<sup>1</sup> Values are shown in the main article; <sup>2</sup> n.d. – not determined.
